# Supplementary material
Source: PubMed Central journal article supplement (PMC7115827)
Supplement: EMS86628-supplement-Supplementary_Material.pdf [file EMS86628-supplement-Supplementary_Material.pdf]

SUPPLEMENTARY DATA

**Supplementary Table S1. Secondary outcomes (weight change and HbA1c change) for participants who have completed the programme, including respectively those for whom all data fields, except HbA1c, were complete (N=14,716) and for those with all data fields complete (N=9,420); univariate analysis**

|              |                       | Mean weight change, completed |                         |                    |              |               | Mean HbA1c change, completed |                        |                   |              |               |
|--------------|-----------------------|-------------------------------|-------------------------|--------------------|--------------|---------------|------------------------------|------------------------|-------------------|--------------|---------------|
|              |                       | N                             | Mean weight at baseline | Mean weight change | 95% CI lower | 95% CI higher | N                            | Mean HbA1c at baseline | Mean HbA1c change | 95% CI lower | 95% CI higher |
| Total        |                       | 14,716                        | 82.4                    | -3.3               | -3.4         | -3.2          | 9,420                        | 41.8                   | -2                | -2.1         | -2.0          |
| Sex          | Male                  | **                            | 89.3                    | -3.7               | -3.8         | -3.6          | **                           | 41.8                   | -2.2              | -2.3         | -2.1          |
|              | Female                | **                            | 76.8                    | -3                 | -3.1         | -2.9          | **                           | 41.8                   | -1.9              | -2           | -1.8          |
|              | Indeterminate         | **                            | **                      | **                 | **           | **            | **                           | **                     | **                | **           | **            |
| Age band     | <40                   | 175                           | 89.3                    | -2.3               | -3           | -1.6          | 116                          | 40.8                   | -1.7              | -2.5         | -0.9          |
|              | 40-44                 | 243                           | 88.3                    | -1.9               | -2.4         | -1.4          | 141                          | 41.7                   | -2                | -2.7         | -1.3          |
|              | 45-49                 | 413                           | 87.5                    | -2.8               | -3.3         | -2.4          | 260                          | 41.5                   | -1.4              | -2           | -0.9          |
|              | 50-54                 | 795                           | 86.9                    | -2.9               | -3.2         | -2.6          | 516                          | 41.8                   | -2                | -2.4         | -1.6          |
|              | 55-59                 | 1,373                         | 86.8                    | -3.2               | -3.4         | -2.9          | 878                          | 41.7                   | -1.9              | -2.1         | -1.6          |
|              | 60-64                 | 1,938                         | 84.2                    | -3.4               | -3.6         | -3.2          | 1,293                        | 41.7                   | -2                | -2.2         | -1.8          |
|              | 65-69                 | 3,193                         | 83.3                    | -3.5               | -3.6         | -3.3          | 2,046                        | 41.8                   | -2.2              | -2.4         | -2            |
|              | 70-74                 | 3,173                         | 81.3                    | -3.5               | -3.7         | -3.4          | 2,043                        | 41.8                   | -2.2              | -2.4         | -2.1          |
| 75+          | 3,413                 | 77.4                          | -3.2                    | -3.4               | -3.1         | 2,127         | 41.9                         | -1.9                   | -2.1              | -1.8         |               |
| Ethnicity    | Asian                 | 1,319                         | 71.9                    | -1.8               | -2           | -1.7          | 872                          | 42.2                   | -1.7              | -2           | -1.5          |
|              | Black                 | 867                           | 85.5                    | -2.6               | -2.8         | -2.3          | 575                          | 42.4                   | -1.6              | -2           | -1.2          |
|              | Mixed                 | 231                           | 82.7                    | -2.9               | -3.4         | -2.3          | 140                          | 42.4                   | -1.9              | -2.4         | -1.3          |
|              | Other                 | 71                            | 78.6                    | -2.7               | -3.7         | -1.7          | 39                           | 41.2                   | -1.3              | -2.5         | 0             |
|              | White                 | 12,228                        | 83.3                    | -3.5               | -3.6         | -3.5          | 7,794                        | 41.7                   | -2.1              | -2.2         | -2            |
| Deprivation  | IMD 1 (most deprived) | 2,073                         | 84                      | -2.9               | -3.1         | -2.7          | 1,291                        | 41.7                   | -1.7              | -1.9         | -1.4          |
|              | IMD 2                 | 2,728                         | 82.9                    | -3.2               | -3.4         | -3            | 1,849                        | 41.8                   | -2.1              | -2.2         | -1.9          |
|              | IMD 3                 | 3,352                         | 82.1                    | -3.2               | -3.3         | -3            | 2,261                        | 41.9                   | -2.1              | -2.2         | -1.9          |
|              | IMD 4                 | 3,224                         | 82.1                    | -3.5               | -3.7         | -3.4          | 1,957                        | 41.7                   | -2.1              | -2.2         | -1.9          |
|              | IMD5 (least deprived) | 3,339                         | 81.6                    | -3.6               | -3.8         | -3.5          | 2,062                        | 41.8                   | -2.2              | -2.4         | -2            |
| BMI grouping | Underweight/healthy   | 2,533                         | 62.9                    | -2                 | -2.2         | -1.9          | 1,671                        | 41.3                   | -2.1              | -2.3         | -1.9          |
|              | Overweight            | 5,752                         | 76.5                    | -3.2               | -3.3         | -3.1          | 3,704                        | 41.6                   | -2                | -2.2         | -1.9          |
|              | Obese                 | 6,431                         | 95.1                    | -3.9               | -4           | -3.8          | 4,045                        | 42.2                   | -2                | -2.2         | -1.9          |
| Provider     | Ingeus UK Ltd         | 2,357                         | 83.8                    | -3.5               | -3.7         | -3.3          | 27                           | 39.7                   | -1.3              | -3.1         | 0.6           |

SUPPLEMENTARY DATA

|  |                                | Mean weight change, completed |                         |                    |              |               | Mean HbA1c change, completed |                        |                   |              |               |
|--|--------------------------------|-------------------------------|-------------------------|--------------------|--------------|---------------|------------------------------|------------------------|-------------------|--------------|---------------|
|  |                                | N                             | Mean weight at baseline | Mean weight change | 95% CI lower | 95% CI higher | N                            | Mean HbA1c at baseline | Mean HbA1c change | 95% CI lower | 95% CI higher |
|  | Living Well Taking Control LLP | 2,156                         | 83.3                    | -2.5               | -2.7         | -2.4          | 1,495                        | 41                     | -0.7              | -0.8         | -0.6          |
|  | ICS Health and Wellbeing       | 7,009                         | 81.4                    | -3.2               | -3.3         | -3.1          | 5,225                        | 42.4                   | -2.1              | -2.2         | -2            |
|  | Reed Momenta Ltd               | 3,194                         | 83                      | -4                 | -4.2         | -3.9          | 2,673                        | 41.1                   | -2.7              | -2.8         | -2.5          |

\*\*Suppressed due to small numbers

SUPPLEMENTARY DATA

**Supplementary Table S2. “Completion” of the programme as the dependent variable, including those for whom all data fields, except HbA1c, were complete (N=26,753); univariate analysis**

|             |                                | N      | %   | 95% CI lower | 95% CI upper | P value |
|-------------|--------------------------------|--------|-----|--------------|--------------|---------|
|             | Total                          | 26,753 | 55% | 54%          | 56%          | n/a     |
| Sex         | Male                           | 11,942 | 55% | 54%          | 56%          | 0.282   |
|             | Female                         | 14,800 | 55% | 54%          | 56%          |         |
|             | Indeterminate                  | 11     | **  | **           | **           |         |
| Age band    | <40                            | 604    | 29% | 25%          | 33%          | <0.001  |
|             | 40-44                          | 693    | 35% | 32%          | 39%          |         |
|             | 45-49                          | 1,116  | 37% | 34%          | 40%          |         |
|             | 50-54                          | 1,873  | 42% | 40%          | 45%          |         |
|             | 55-59                          | 2,723  | 50% | 49%          | 52%          |         |
|             | 60-64                          | 3,489  | 56% | 54%          | 57%          |         |
|             | 65-69                          | 5,201  | 61% | 60%          | 63%          |         |
|             | 70-74                          | 5,161  | 61% | 60%          | 63%          |         |
| 75+         | 5,893                          | 58%    | 57% | 59%          |              |         |
| Ethnicity   | Asian                          | 3,087  | 43% | 41%          | 44%          | <0.001  |
|             | Black                          | 1,821  | 48% | 45%          | 50%          |         |
|             | Mixed                          | 513    | 45% | 41%          | 49%          |         |
|             | Other                          | 181    | 39% | 32%          | 46%          |         |
|             | White                          | 21,151 | 58% | 57%          | 58%          |         |
| Deprivation | IMD 1 (most deprived)          | 4,430  | 47% | 45%          | 48%          | <0.001  |
|             | IMD 2                          | 5,161  | 53% | 51%          | 54%          |         |
|             | IMD 3                          | 5,922  | 57% | 55%          | 58%          |         |
|             | IMD 4                          | 5,635  | 57% | 56%          | 59%          |         |
|             | IMD5 (least deprived)          | 5,605  | 60% | 58%          | 61%          |         |
|             | Underweight/<br>healthy        | 4,205  | 60% | 59%          | 62%          | <0.001  |
|             | Overweight                     | 9,865  | 58% | 57%          | 59%          |         |
|             | Obese                          | 12,683 | 51% | 50%          | 52%          |         |
| Provider    | Ingeus UK Ltd                  | 5,868  | 40% | 39%          | 41%          | <0.001  |
|             | Living Well Taking Control LLP | 3,067  | 70% | 69%          | 72%          |         |
|             | ICS Health and Wellbeing       | 11,752 | 60% | 59%          | 61%          |         |
|             | Reed Momenta Ltd               | 6,066  | 53% | 51%          | 54%          |         |

\*\*Suppressed due to small numbers

SUPPLEMENTARY DATA

**Supplementary Table S3. “Completion” of the programme as the dependent variable, including those for whom all data fields, except HbA1c, were complete (N=26,753); mixed effects logistic regression**

|             |                                | Odds Ratio | 95% lower CI | 95% upper CI | P value |
|-------------|--------------------------------|------------|--------------|--------------|---------|
| Sex         | Male                           | 1.00       |              |              |         |
|             | Female                         | 1.00       | 0.95         | 1.05         | 0.92    |
|             | Indeterminate                  | 0.39       | 0.11         | 1.37         | 0.14    |
| Age group   | <40                            | 1.00       |              |              |         |
|             | 40-44                          | 1.29       | 1.01         | 1.64         | 0.04    |
|             | 45-49                          | 1.35       | 1.09         | 1.69         | 0.01    |
|             | 50-54                          | 1.61       | 1.31         | 1.97         | <0.001  |
|             | 55-59                          | 2.19       | 1.79         | 2.67         | <0.001  |
|             | 60-64                          | 2.52       | 2.07         | 3.07         | <0.001  |
|             | 65-69                          | 3.11       | 2.57         | 3.78         | <0.001  |
|             | 70-74                          | 3.02       | 2.49         | 3.67         | <0.001  |
| 75+         | 2.54                           | 2.09       | 3.08         | <0.001       |         |
| Deprivation | IMD 1 (most deprived)          | 1.00       |              |              |         |
|             | IMD 2                          | 1.18       | 1.09         | 1.29         | <0.001  |
|             | IMD 3                          | 1.29       | 1.18         | 1.41         | <0.001  |
|             | IMD 4                          | 1.37       | 1.25         | 1.49         | <0.001  |
|             | IMD 5 (least deprived)         | 1.57       | 1.43         | 1.72         | <0.001  |
| Ethnicity   | White                          | 1.00       |              |              |         |
|             | Asian                          | 0.75       | 0.69         | 0.83         | <0.001  |
|             | Black                          | 1.04       | 0.93         | 1.17         | 0.45    |
|             | Mixed                          | 0.82       | 0.68         | 0.99         | 0.04    |
|             | Other                          | 0.83       | 0.60         | 1.13         | 0.23    |
| BMI         | Healthy / underweight          | 1.00       |              |              |         |
|             | Overweight                     | 0.96       | 0.89         | 1.04         | 0.30    |
|             | Obese                          | 0.78       | 0.72         | 0.84         | <0.001  |
| Provider    | ICS Health and Wellbeing       | 1.00       |              |              |         |
|             | Ingeus UK Ltd                  | 0.55       | 0.38         | 0.79         | 0.00    |
|             | Living Well Taking Control LLP | 1.91       | 1.39         | 2.62         | <0.001  |
|             | Reed Momenta Ltd               | 0.87       | 0.64         | 1.20         | 0.40    |

| Random-effects Parameters     | Estimate | Standard error | 95% lower CI | 95% upper CI |
|-------------------------------|----------|----------------|--------------|--------------|
| Local Referral Area: Identity |          |                |              |              |
| var(_cons)                    | 0.13     | 0.04           | 0.07         | 0.25         |

LR test vs. logistic model:  $\chi^2(01) = 157.9$

Prob  $\geq \chi^2 \Rightarrow 0.001$

SUPPLEMENTARY DATA

**Supplementary Table S4. Mixed effects linear regression models for primary outcomes (weight change and HbA1c change), including respectively those for whom all data fields, except HbA1c, were complete (N=26,753) and for those with all data fields complete (N=16,083); Intention to treat analysis**

|             |                                                       | Weight change |              |              |                |         | HbA1c       |              |              |                |         |
|-------------|-------------------------------------------------------|---------------|--------------|--------------|----------------|---------|-------------|--------------|--------------|----------------|---------|
|             |                                                       | Coefficient   | 95% lower CI | 95% upper CI | Standard error | P value | Coefficient | 95% CI lower | 95% CI upper | Standard error | P value |
|             | Baseline measurement (weight (kg) / HbA1c (mmol/mol)) | -0.04         | -0.05        | -0.03        | 0              | <0.001  | -0.54       | -0.56        | -0.52        | 0.01           | <0.001  |
|             | Number of intervention sessions attended              | -0.37         | -0.41        | -0.33        | 0.02           | <0.001  | -0.22       | -0.26        | -0.18        | 0.02           | <0.001  |
|             | Weight change                                         | n/a           | n/a          | n/a          | n/a            | n/a     | 0.17        | 0.15         | 0.18         | 0.01           | <0.001  |
| Age group   | <40                                                   |               |              |              |                |         |             |              |              |                |         |
|             | 40-44                                                 | 0.35          | -0.43        | 1.12         | 0.4            | 0.38    | 0.02        | -0.79        | 0.83         | 0.41           | 0.96    |
|             | 45-49                                                 | -0.45         | -1.16        | 0.26         | 0.36           | 0.21    | 0.54        | -0.18        | 1.26         | 0.37           | 0.14    |
|             | 50-54                                                 | -0.38         | -1.04        | 0.28         | 0.34           | 0.26    | 0.32        | -0.35        | 0.99         | 0.34           | 0.35    |
|             | 55-59                                                 | -0.55         | -1.19        | 0.08         | 0.32           | 0.09    | 0.52        | -0.12        | 1.17         | 0.33           | 0.11    |
|             | 60-64                                                 | -0.73         | -1.36        | -0.1         | 0.32           | 0.02    | 0.63        | -0.01        | 1.26         | 0.32           | 0.05    |
|             | 65-69                                                 | -0.72         | -1.34        | -0.1         | 0.32           | 0.02    | 0.62        | -0.01        | 1.25         | 0.32           | 0.05    |
|             | 70-74                                                 | -0.8          | -1.43        | -0.17        | 0.32           | 0.01    | 0.68        | 0.04         | 1.31         | 0.32           | 0.04    |
|             | 75+                                                   | -0.74         | -1.37        | -0.12        | 0.32           | 0.02    | 0.99        | 0.36         | 1.62         | 0.32           | <0.001  |
| Sex         | Male                                                  |               |              |              |                |         |             |              |              |                |         |
|             | Female                                                | 0.08          | -0.07        | 0.24         | 0.08           | 0.28    | 0.16        | 0.03         | 0.3          | 0.07           | 0.02    |
|             | Indeterminate                                         | -1.11         | -5.03        | 2.81         | 2              | 0.58    | 2.64        | -0.58        | 5.86         | 1.64           | 0.11    |
| Ethnicity   | White                                                 |               |              |              |                |         |             |              |              |                |         |
|             | Asian                                                 | 0.7           | 0.42         | 0.97         | 0.14           | <0.001  | 0.32        | 0.05         | 0.59         | 0.14           | 0.02    |
|             | Black                                                 | 0.55          | 0.24         | 0.86         | 0.16           | <0.001  | 0.6         | 0.28         | 0.92         | 0.16           | <0.001  |
|             | Mixed                                                 | 0.28          | -0.25        | 0.81         | 0.27           | 0.3     | 0.35        | -0.21        | 0.92         | 0.29           | 0.22    |
|             | Other                                                 | 0.64          | -0.3         | 1.58         | 0.48           | 0.19    | 1.07        | 0.02         | 2.11         | 0.54           | 0.05    |
| Deprivation | IMD 1 (most deprived)                                 |               |              |              |                |         |             |              |              |                |         |
|             | IMD 2                                                 | -0.16         | -0.39        | 0.08         | 0.12           | 0.19    | -0.27       | -0.51        | -0.03        | 0.12           | 0.03    |
|             | IMD 3                                                 | -0.08         | -0.31        | 0.15         | 0.12           | 0.49    | -0.22       | -0.46        | 0.02         | 0.12           | 0.07    |
|             | IMD 4                                                 | -0.27         | -0.51        | -0.04        | 0.12           | 0.02    | -0.12       | -0.37        | 0.12         | 0.13           | 0.32    |
|             | IMD 5 (least deprived)                                | -0.31         | -0.55        | -0.07        | 0.12           | 0.01    | -0.17       | -0.42        | 0.08         | 0.13           | 0.18    |

SUPPLEMENTARY DATA

|              |                                | Weight change |              |              |                |         | HbA1c       |              |              |                |         |
|--------------|--------------------------------|---------------|--------------|--------------|----------------|---------|-------------|--------------|--------------|----------------|---------|
|              |                                | Coefficient   | 95% lower CI | 95% upper CI | Standard error | P value | Coefficient | 95% CI lower | 95% CI upper | Standard error | P value |
| BMI grouping | Underweight/healthy            |               |              |              |                |         |             |              |              |                |         |
|              | Overweight                     | -0.7          | -0.9         | -0.5         | 0.1            | <0.001  | 0.45        | 0.26         | 0.64         | 0.1            | <0.001  |
|              | Obese                          | -0.8          | -1.06        | -0.53        | 0.14           | <0.001  | 0.82        | 0.62         | 1.01         | 0.1            | <0.001  |
| Provider     | ICS Health and Wellbeing       |               |              |              |                |         |             |              |              |                |         |
|              | Ingeus UK Ltd                  | -0.27         | -0.68        | 0.15         | 0.21           | 0.2     | -0.4        | -1.75        | 0.95         | 0.69           | 0.56    |
|              | Living Well Taking Control LLP | 0.77          | 0.41         | 1.13         | 0.18           | <0.001  | 0.68        | 0.21         | 1.16         | 0.24           | 0.01    |
|              | Reed Momenta Ltd               | 0.73          | 0.35         | 1.11         | 0.19           | <0.001  | 0           | -0.48        | 0.48         | 0.25           | 0.99    |
|              | Constant                       | 5.31          | 4.38         | 6.24         | 0.48           | <0.001  | 22.35       | 21.18        | 23.52        | 0.6            | <0.001  |

| Random-effects Parameters     | Weight change |                |              |              | HbA1c change |                |              |              |
|-------------------------------|---------------|----------------|--------------|--------------|--------------|----------------|--------------|--------------|
|                               | Estimate      | Standard error | 95% lower CI | 95% upper CI | Estimate     | Standard error | 95% lower CI | 95% upper CI |
| Local Referral Area: Identity |               |                |              |              |              |                |              |              |
| var(_cons)                    | 0.12          | 0.04           | 0.06         | 0.24         | 0.25         | 0.07           | 0.14         | 0.4          |
| var (residual)                | 15.9          | 0.19           | 15.6         | 16.4         | 10.7         | 0.16           | 10.4         | 11.1         |

Weight change; LR test vs. linear model:  $\chi^2(01) = 57.5$ , Prob  $\geq \chi^2 = <0.001$   
HbA1c change; LR test vs linear model:  $\chi^2(01) = 168.22$ , Prob  $\geq \chi^2 = <0.001$

SUPPLEMENTARY DATA

**Supplementary Table S5. Mixed effects linear regression models for secondary outcomes (weight change and HbA1c change) using completer analysis, including respectively those for whom all data fields, except HbA1c, were complete, (N=14,716)) and for who all data fields were complete (N=9,420)**

|             |                                                       | Weight change |              |              |                |         | HbA1c       |              |              |                |         |
|-------------|-------------------------------------------------------|---------------|--------------|--------------|----------------|---------|-------------|--------------|--------------|----------------|---------|
|             |                                                       | Coefficient   | 95% lower CI | 95% upper CI | Standard error | P value | Coefficient | 95% CI lower | 95% CI upper | Standard error | P value |
|             | Baseline measurement (weight (kg) / HbA1c (mmol/mol)) | -0.04         | -0.05        | -0.03        | 0              | <0.001  | -0.54       | -0.56        | -0.52        | 0.01           | <0.001  |
|             | Number of intervention sessions attended              | -0.37         | -0.41        | -0.33        | 0.02           | <0.001  | -0.22       | -0.26        | -0.18        | 0.02           | <0.001  |
|             | Weight change                                         | n/a           | n/a          | n/a          | n/a            | n/a     | 0.17        | 0.15         | 0.18         | 0.01           | <0.001  |
| Age group   | <40                                                   |               |              |              |                |         |             |              |              |                |         |
|             | 40-44                                                 | 0.35          | -0.43        | 1.12         | 0.4            | 0.38    | 0.02        | -0.79        | 0.83         | 0.41           | 0.96    |
|             | 45-49                                                 | -0.45         | -1.16        | 0.26         | 0.36           | 0.21    | 0.54        | -0.18        | 1.26         | 0.37           | 0.14    |
|             | 50-54                                                 | -0.38         | -1.04        | 0.28         | 0.34           | 0.26    | 0.32        | -0.35        | 0.99         | 0.34           | 0.35    |
|             | 55-59                                                 | -0.55         | -1.19        | 0.08         | 0.32           | 0.09    | 0.52        | -0.12        | 1.17         | 0.33           | 0.11    |
|             | 60-64                                                 | -0.73         | -1.36        | -0.1         | 0.32           | 0.02    | 0.63        | -0.01        | 1.26         | 0.32           | 0.05    |
|             | 65-69                                                 | -0.72         | -1.34        | -0.1         | 0.32           | 0.02    | 0.62        | -0.01        | 1.25         | 0.32           | 0.05    |
|             | 70-74                                                 | -0.8          | -1.43        | -0.17        | 0.32           | 0.01    | 0.68        | 0.04         | 1.31         | 0.32           | 0.04    |
|             | 75+                                                   | -0.74         | -1.37        | -0.12        | 0.32           | 0.02    | 0.99        | 0.36         | 1.62         | 0.32           | <0.001  |
| Sex         | Male                                                  |               |              |              |                |         |             |              |              |                |         |
|             | Female                                                | 0.08          | -0.07        | 0.24         | 0.08           | 0.28    | 0.16        | 0.03         | 0.3          | 0.07           | 0.02    |
|             | Indeterminate                                         | -1.11         | -5.03        | 2.81         | 2              | 0.58    | 2.64        | -0.58        | 5.86         | 1.64           | 0.11    |
| Ethnicity   | White                                                 |               |              |              |                |         |             |              |              |                |         |
|             | Asian                                                 | 0.7           | 0.42         | 0.97         | 0.14           | <0.001  | 0.32        | 0.05         | 0.59         | 0.14           | 0.02    |
|             | Black                                                 | 0.55          | 0.24         | 0.86         | 0.16           | <0.001  | 0.6         | 0.28         | 0.92         | 0.16           | <0.001  |
|             | Mixed                                                 | 0.28          | -0.25        | 0.81         | 0.27           | 0.3     | 0.35        | -0.21        | 0.92         | 0.29           | 0.22    |
|             | Other                                                 | 0.64          | -0.3         | 1.58         | 0.48           | 0.19    | 1.07        | 0.02         | 2.11         | 0.54           | 0.05    |
| Deprivation | IMD 1 (most deprived)                                 |               |              |              |                |         |             |              |              |                |         |
|             | IMD 2                                                 | -0.16         | -0.39        | 0.08         | 0.12           | 0.19    | -0.27       | -0.51        | -0.03        | 0.12           | 0.03    |
|             | IMD 3                                                 | -0.08         | -0.31        | 0.15         | 0.12           | 0.49    | -0.22       | -0.46        | 0.02         | 0.12           | 0.07    |
|             | IMD 4                                                 | -0.27         | -0.51        | -0.04        | 0.12           | 0.02    | -0.12       | -0.37        | 0.12         | 0.13           | 0.32    |
|             | IMD 5 (least deprived)                                | -0.31         | -0.55        | -0.07        | 0.12           | 0.01    | -0.17       | -0.42        | 0.08         | 0.13           | 0.18    |

SUPPLEMENTARY DATA

|              |                                | Weight change |              |              |                |         | HbA1c       |              |              |                |         |
|--------------|--------------------------------|---------------|--------------|--------------|----------------|---------|-------------|--------------|--------------|----------------|---------|
|              |                                | Coefficient   | 95% lower CI | 95% upper CI | Standard error | P value | Coefficient | 95% CI lower | 95% CI upper | Standard error | P value |
| BMI grouping | Underweight/healthy            |               |              |              |                |         |             |              |              |                |         |
|              | Overweight                     | -0.7          | -0.9         | -0.5         | 0.1            | <0.001  | 0.45        | 0.26         | 0.64         | 0.1            | <0.001  |
|              | Obese                          | -0.8          | -1.06        | -0.53        | 0.14           | <0.001  | 0.82        | 0.62         | 1.01         | 0.1            | <0.001  |
| Provider     | ICS Health and Wellbeing       |               |              |              |                |         |             |              |              |                |         |
|              | Ingeus UK Ltd                  | -0.27         | -0.68        | 0.15         | 0.21           | 0.2     | -0.4        | -1.75        | 0.95         | 0.69           | 0.56    |
|              | Living Well Taking Control LLP | 0.77          | 0.41         | 1.13         | 0.18           | <0.001  | 0.68        | 0.21         | 1.16         | 0.24           | 0.01    |
|              | Reed Momenta Ltd               | 0.73          | 0.35         | 1.11         | 0.19           | <0.001  | 0           | -0.48        | 0.48         | 0.25           | 0.99    |
|              | Constant                       | 5.31          | 4.38         | 6.24         | 0.48           | <0.001  | 22.35       | 21.18        | 23.52        | 0.6            | <0.001  |

| Random-effects Parameters     | Weight change |                |              |              | HbA1c change |                |              |              |
|-------------------------------|---------------|----------------|--------------|--------------|--------------|----------------|--------------|--------------|
|                               | Estimate      | Standard error | 95% lower CI | 95% upper CI | Estimate     | Standard error | 95% lower CI | 95% upper CI |
| Local Referral Area: Identity |               |                |              |              |              |                |              |              |
| var(_cons)                    | 0.12          | 0.04           | 0.06         | 0.24         | 0.25         | 0.07           | 0.14         | 0.4          |
| var (residual)                | 15.9          | 0.19           | 15.6         | 16.4         | 10.7         | 0.16           | 10.4         | 11.1         |

Weight change: LR test vs. linear model:  $\chi^2(01)=48.34$ ,  $\text{Prob} > \chi^2 = <0.001$

HbA1c change: Linear test vs. linear model:  $\chi^2(01) = 159.95$ ,  $\text{Prob} > \chi^2 = <0.001$



SUPPLEMENTARY DATA

**Supplementary Table S6. Mean weight change using multiple imputation data, univariate analysis**

|              |                                | Completed (N=17,252)    |                    |              |               | Intention to treat (N=32,665) |                    |              |               |
|--------------|--------------------------------|-------------------------|--------------------|--------------|---------------|-------------------------------|--------------------|--------------|---------------|
|              |                                | Mean weight at baseline | Mean weight change | 95% CI lower | 95% CI higher | Mean weight at baseline       | Mean weight change | 95% CI lower | 95% CI higher |
|              | Total                          | 82.5                    | -3.4               | -3.4         | -3.3          | 83.6                          | -2.2               | -2.3         | -2.2          |
| Sex*         | Male                           | 89.5                    | -3.8               | -3.9         | -3.7          | 90.2                          | -2.5               | -2.6         | -2.4          |
|              | Female                         | 76.9                    | -3.0               | -3.1         | -3.0          | 78.3                          | -2.0               | -2.1         | -2.0          |
| Age band     | <40                            | 89.1                    | -2.4               | -3.0         | -1.8          | 90.1                          | -1.1               | -1.3         | -0.8          |
|              | 40-44                          | 88.9                    | -2.1               | -2.6         | -1.6          | 90.3                          | -1.0               | -1.3         | -0.8          |
|              | 45-49                          | 87.8                    | -3.1               | -3.5         | -2.6          | 90.7                          | -1.7               | -1.9         | -1.5          |
|              | 50-54                          | 87.1                    | -3.0               | -3.3         | -2.7          | 89.0                          | -1.7               | -1.9         | -1.6          |
|              | 55-59                          | 86.8                    | -3.2               | -3.4         | -3.0          | 88.0                          | -2.0               | -2.2         | -1.9          |
|              | 60-64                          | 84.3                    | -3.4               | -3.6         | -3.2          | 85.3                          | -2.3               | -2.5         | -2.2          |
|              | 65-69                          | 83.2                    | -3.6               | -3.7         | -3.4          | 83.6                          | -2.6               | -2.7         | -2.5          |
|              | 70-74                          | 81.2                    | -3.6               | -3.7         | -3.5          | 81.6                          | -2.6               | -2.7         | -2.5          |
|              | 75+                            | 77.5                    | -3.3               | -3.4         | -3.2          | 77.2                          | -2.2               | -2.3         | -2.1          |
| Ethnicity    | Asian                          | 72.5                    | -1.9               | -2.1         | -1.7          | 75.1                          | -1.0               | -1.1         | -0.9          |
|              | Black                          | 85.6                    | -2.7               | -3.0         | -2.5          | 86.4                          | -1.7               | -1.9         | -1.6          |
|              | Mixed                          | 82.9                    | -3.0               | -3.5         | -2.4          | 84.1                          | -1.7               | -2.0         | -1.4          |
|              | Other                          | 78.7                    | -2.8               | -3.7         | -1.9          | 80.8                          | -1.5               | -2.0         | -1.0          |
|              | White                          | 83.4                    | -3.6               | -3.7         | -3.5          | 84.6                          | -2.5               | -2.5         | -2.4          |
| Deprivation  | IMD 1 (most deprived)          | 84.0                    | -3.0               | -3.1         | -2.8          | 85.0                          | -1.7               | -1.8         | -1.6          |
|              | IMD 2                          | 83.3                    | -3.3               | -3.4         | -3.1          | 84.4                          | -2.1               | -2.2         | -2.0          |
|              | IMD 3                          | 82.4                    | -3.3               | -3.4         | -3.1          | 83.4                          | -2.2               | -2.3         | -2.1          |
|              | IMD 4                          | 82.1                    | -3.6               | -3.7         | -3.4          | 83.3                          | -2.4               | -2.5         | -2.3          |
|              | IMD5 (least deprived)          | 81.5                    | -3.6               | -3.8         | -3.5          | 82.2                          | -2.6               | -2.7         | -2.5          |
| BMI grouping | Underweight/healthy            | 62.9                    | -2.1               | -2.2         | -2.0          | 62.6                          | -1.4               | -1.4         | -1.3          |
|              | Overweight                     | 76.6                    | -3.2               | -3.3         | -3.1          | 76.6                          | -2.2               | -2.2         | -2.1          |
|              | Obese                          | 95.5                    | -4.0               | -4.1         | -3.9          | 96.0                          | -2.6               | -2.6         | -2.5          |
| Provider     | Ingeus UK Ltd                  | 83.7                    | -3.5               | -3.7         | -3.3          | 85.0                          | -2.0               | -2.1         | -2.0          |
|              | Living Well Taking Control LLP | 83.4                    | -2.5               | -2.7         | -2.3          | 84.3                          | -1.9               | -2.0         | -1.8          |
|              | ICS Health and Wellbeing       | 81.3                    | -3.2               | -3.2         | -3.1          | 82.3                          | -2.2               | -2.3         | -2.2          |
|              | Reed Momenta Ltd               | 83.4                    | -4.0               | -4.1         | -3.9          | 84.1                          | -2.5               | -2.6         | -2.4          |

\*Due to very small numbers, Indeterminate was not imputed

SUPPLEMENTARY DATA

**Supplementary Table S7. Mean HbA1c change for multiple imputation data, univariate analysis**

|              |                            | Completed (N=11,167)   |                   |              |               | Intention to treat (N=19,891) |                   |              |               |
|--------------|----------------------------|------------------------|-------------------|--------------|---------------|-------------------------------|-------------------|--------------|---------------|
|              |                            | Mean hba1c at baseline | Mean hba1c change | 95% CI lower | 95% CI higher | Mean hba1c at baseline        | Mean hba1c change | 95% CI lower | 95% CI higher |
|              | Total                      | 41.8                   | -2.1              | -2.2         | -2.0          | 41.7                          | -1.2              | -1.3         | -1.2          |
| Sex*         | Male                       | 41.7                   | -2.3              | -2.4         | -2.2          | 41.7                          | -1.4              | -1.4         | -1.3          |
|              | Female                     | 41.8                   | -2.0              | -2.1         | -1.9          | 41.8                          | -1.2              | -1.2         | -1.1          |
| Age band     | <40                        | 41.0                   | -2.0              | -2.7         | -1.3          | 41.1                          | -0.7              | -1.0         | -0.5          |
|              | 40-44                      | 41.8                   | -1.9              | -2.5         | -1.3          | 41.6                          | -0.7              | -0.9         | -0.4          |
|              | 45-49                      | 41.2                   | -1.4              | -1.9         | -0.9          | 41.4                          | -0.6              | -0.8         | -0.4          |
|              | 50-54                      | 41.7                   | -1.9              | -2.3         | -1.6          | 41.7                          | -0.9              | -1.1         | -0.8          |
|              | 55-59                      | 41.7                   | -2.0              | -2.2         | -1.7          | 41.8                          | -1.1              | -1.2         | -1.0          |
|              | 60-64                      | 41.7                   | -2.1              | -2.3         | -1.9          | 41.7                          | -1.3              | -1.4         | -1.2          |
|              | 65-69                      | 41.7                   | -2.2              | -2.4         | -2.1          | 41.7                          | -1.4              | -1.6         | -1.3          |
|              | 70-74                      | 41.8                   | -2.3              | -2.4         | -2.1          | 41.8                          | -1.5              | -1.6         | -1.4          |
|              | 75+                        | 41.9                   | -2.0              | -2.2         | -1.8          | 42.0                          | -1.3              | -1.4         | -1.2          |
|              | Ethnicity                  | Asian                  | 42.1              | -1.8         | -2.0          | -1.5                          | 42.1              | -0.8         | -1.0          |
| Black        |                            | 42.1                   | -1.6              | -1.9         | -1.2          | 42.1                          | -0.8              | -1.0         | -0.6          |
| Mixed        |                            | 42.2                   | -1.9              | -2.5         | -1.2          | 42.1                          | -0.9              | -1.3         | -0.6          |
| Other        |                            | 41.0                   | -1.2              | -2.5         | 0.1           | 41.1                          | -0.5              | -1.1         | 0.1           |
| White        |                            | 41.7                   | -2.2              | -2.3         | -2.1          | 41.7                          | -1.4              | -1.4         | -1.3          |
| Deprivation  | IMD 1 (most deprived)      | 41.6                   | -1.7              | -1.9         | -1.4          | 41.8                          | -0.8              | -0.9         | -0.7          |
|              | IMD 2                      | 41.8                   | -2.1              | -2.3         | -1.9          | 41.7                          | -1.2              | -1.3         | -1.1          |
|              | IMD 3                      | 41.8                   | -2.1              | -2.3         | -2.0          | 41.8                          | -1.3              | -1.4         | -1.2          |
|              | IMD 4                      | 41.7                   | -2.2              | -2.4         | -2.0          | 41.7                          | -1.3              | -1.4         | -1.2          |
|              | IMD5 (least deprived)      | 41.7                   | -2.3              | -2.4         | -2.1          | 41.7                          | -1.5              | -1.6         | -1.4          |
| BMI grouping | Underweight/healthy        | 41.2                   | -2.1              | -2.3         | -1.9          | 41.2                          | -1.3              | -1.5         | -1.2          |
|              | Overweight                 | 41.6                   | -2.1              | -2.2         | -2.0          | 41.6                          | -1.3              | -1.4         | -1.2          |
|              | Obese                      | 42.1                   | -2.1              | -2.2         | -2.0          | 42.1                          | -1.2              | -1.2         | -1.1          |
| Provider     | Ingeus UK Ltd              | 39.4                   | -0.8              | -2.2         | 0.7           | 39.3                          | -0.6              | -1.7         | 0.5           |
|              | Living Well Taking Control | 41.0                   | -0.7              | -0.9         | -0.6          | 40.9                          | -0.5              | -0.6         | -0.4          |
|              | ICS Health and Wellbeing   | 42.4                   | -2.1              | -2.2         | -2.0          | 42.3                          | -1.3              | -1.3         | -1.2          |
|              | Reed Momenta Ltd           | 41.2                   | -2.6              | -2.7         | -2.4          | 41.3                          | -1.4              | -1.5         | -1.3          |

\*Due to very small numbers, Indeterminate was not imputed

SUPPLEMENTARY DATA

**Supplementary Table S8. Mixed effects linear regression models for primary outcomes (weight change and HbA1c change) using Intention to treat analysis for multiple imputation data**

|                                                       |                        | Weight change, intention to treat (N=32,665) |              |              |                |         | HbA1c change, intention to treat, (N=19,981) |              |              |                |         |
|-------------------------------------------------------|------------------------|----------------------------------------------|--------------|--------------|----------------|---------|----------------------------------------------|--------------|--------------|----------------|---------|
|                                                       |                        | Coefficient                                  | 95% lower CI | 95% upper CI | Standard error | P value | Coefficient                                  | 95% CI lower | 95% CI upper | Standard error | P value |
| Baseline measurement (weight (kg) / HbA1c (mmol/mol)) |                        | -0.03                                        | -0.03        | -0.02        | 0.00           | <0.001  | -0.32                                        | -0.33        | -0.31        | 0.01           | <0.001  |
| Number of intervention sessions attended              |                        | -0.32                                        | -0.33        | -0.31        | 0.00           | <0.001  | -0.17                                        | -0.18        | -0.16        | 0.00           | <0.001  |
| Weight change                                         |                        | n/a                                          | n/a          | n/a          | n/a            | n/a     | 0.14                                         | 0.13         | 0.15         | 0.01           | <0.001  |
| Sex*                                                  | Male                   |                                              |              |              |                |         |                                              |              |              |                |         |
|                                                       | Female                 | 0.13                                         | 0.04         | 0.22         | 0.05           | 0.01    | 0.1                                          | 0.02         | 0.18         | 0.04           | 0.02    |
| Age group                                             | <40                    |                                              |              |              |                |         |                                              |              |              |                |         |
|                                                       | 40-44                  | 0.22                                         | -0.12        | 0.57         | 0.17           | 0.2     | 0.18                                         | -0.18        | 0.54         | 0.18           | 0.33    |
|                                                       | 45-49                  | -0.22                                        | -0.53        | 0.08         | 0.16           | 0.15    | 0.49                                         | 0.16         | 0.81         | 0.17           | <0.001  |
|                                                       | 50-54                  | -0.07                                        | -0.36        | 0.22         | 0.15           | 0.65    | 0.39                                         | 0.08         | 0.69         | 0.16           | 0.01    |
|                                                       | 55-59                  | -0.12                                        | -0.4         | 0.16         | 0.14           | 0.39    | 0.46                                         | 0.17         | 0.76         | 0.15           | <0.001  |
|                                                       | 60-64                  | -0.28                                        | -0.55        | 0            | 0.14           | 0.05    | 0.48                                         | 0.19         | 0.77         | 0.15           | <0.001  |
|                                                       | 65-69                  | -0.38                                        | -0.66        | -0.11        | 0.14           | 0.01    | 0.47                                         | 0.18         | 0.76         | 0.15           | <0.001  |
|                                                       | 70-74                  | -0.43                                        | -0.7         | -0.15        | 0.14           | <0.001  | 0.49                                         | 0.2          | 0.78         | 0.15           | <0.001  |
| 75+                                                   | -0.35                  | -0.63                                        | -0.08        | 0.14         | 0.01           | 0.68    | 0.39                                         | 0.96         | 0.15         | <0.001         |         |
| Ethnicity                                             | White                  |                                              |              |              |                |         |                                              |              |              |                |         |
|                                                       | Asian                  | 0.44                                         | 0.29         | 0.6          | 0.08           | <0.001  | 0.13                                         | -0.03        | 0.3          | 0.08           | 0.12    |
|                                                       | Black                  | 0.24                                         | 0.05         | 0.42         | 0.09           | 0.01    | 0.34                                         | 0.13         | 0.55         | 0.11           | <0.001  |
|                                                       | Mixed                  | 0.18                                         | -0.11        | 0.47         | 0.15           | 0.23    | 0.11                                         | -0.24        | 0.47         | 0.18           | 0.53    |
|                                                       | Other                  | 0.21                                         | -0.28        | 0.7          | 0.25           | 0.4     | 0.41                                         | -0.16        | 0.98         | 0.29           | 0.16    |
| Deprivation                                           | IMD 1 (most deprived)  |                                              |              |              |                |         |                                              |              |              |                |         |
|                                                       | IMD 2                  | -0.12                                        | -0.25        | 0.01         | 0.07           | 0.07    | -0.23                                        | -0.37        | -0.1         | 0.07           | <0.001  |
|                                                       | IMD 3                  | -0.07                                        | -0.2         | 0.07         | 0.07           | 0.33    | -0.25                                        | -0.39        | -0.11        | 0.07           | <0.001  |
|                                                       | IMD 4                  | -0.16                                        | -0.3         | -0.02        | 0.07           | 0.03    | -0.17                                        | -0.31        | -0.03        | 0.07           | 0.02    |
|                                                       | IMD 5 (least deprived) | -0.22                                        | -0.36        | -0.09        | 0.07           | <0.001  | -0.22                                        | -0.37        | -0.07        | 0.08           | <0.001  |
| BMI grouping                                          | Underweight/healthy    |                                              |              |              |                |         |                                              |              |              |                |         |
|                                                       | Overweight             | -0.53                                        | -0.66        | -0.41        | 0.06           | <0.001  | 0.25                                         | 0.13         | 0.38         | 0.06           | <0.001  |
|                                                       | Obese                  | -0.71                                        | -0.87        | -0.55        | 0.08           | <0.001  | 0.48                                         | 0.36         | 0.61         | 0.06           | <0.001  |
| Provider                                              | ICS Health and         |                                              |              |              |                |         |                                              |              |              |                |         |

SUPPLEMENTARY DATA

|  |                                | Weight change, intention to treat (N=32,665) |              |              |                |         | HbA1c change, intention to treat, (N=19,981) |              |              |                |         |
|--|--------------------------------|----------------------------------------------|--------------|--------------|----------------|---------|----------------------------------------------|--------------|--------------|----------------|---------|
|  |                                | Coefficient                                  | 95% lower CI | 95% upper CI | Standard error | P value | Coefficient                                  | 95% CI lower | 95% CI upper | Standard error | P value |
|  | Wellbeing                      |                                              |              |              |                |         |                                              |              |              |                |         |
|  | Ingeus UK Ltd                  | -0.12                                        | -0.36        | 0.13         | 0.13           | 0.36    | 0.17                                         | -0.76        | 1.09         | 0.47           | 0.73    |
|  | Living Well Taking Control LLP | 0.66                                         | 0.43         | 0.89         | 0.12           | <0.001  | 0.49                                         | 0.18         | 0.8          | 0.16           | <0.001  |
|  | Reed Momenta Ltd               | 0.3                                          | 0.09         | 0.51         | 0.11           | 0.01    | -0.12                                        | -0.41        | 0.16         | 0.14           | 0.39    |
|  | Constant                       | 3.09                                         | 2.66         | 3.52         | 0.22           | <0.001  | 13.17                                        | 12.58        | 13.77        | 0.3            | <0.001  |

| Random-effects Parameters     | Weight change |                |              |              | HbA1c change |                |              |              |
|-------------------------------|---------------|----------------|--------------|--------------|--------------|----------------|--------------|--------------|
|                               | Estimate      | Standard error | 95% lower CI | 95% upper CI | Estimate     | Standard error | 95% lower CI | 95% upper CI |
| Local Referral Area: Identity |               |                |              |              |              |                |              |              |
| sd(_cons)                     | 0.2           | 0.04           | 0.15         | 0.3          | 0.31         | 0.05           | 0.24         | 0.42         |
| sd (residual)                 | 3.5           | 0.01           | 3.4          | 3.5          | 2.9          | 0.01           | 2.9          | 2.9          |

SUPPLEMENTARY DATA

**Supplementary Table S9. “Completion” of the programme as the dependent variable, using multiple imputation data (N=32,665), mixed effect logistic regression**

|             |                                | Odds Ratio | 95% lower CI | 95% upper CI | P value |
|-------------|--------------------------------|------------|--------------|--------------|---------|
| Sex*        | Male                           | 1          |              |              |         |
|             | Female                         | 0.99       | 0.95         | 1.04         | 0.77    |
| Age group   | <40                            | 1.00       |              |              |         |
|             | 40-44                          | 1.28       | 1.03         | 1.58         | 0.02    |
|             | 45-49                          | 1.36       | 1.12         | 1.64         | <0.001  |
|             | 50-54                          | 1.58       | 1.32         | 1.89         | <0.001  |
|             | 55-59                          | 2.19       | 1.84         | 2.60         | <0.001  |
|             | 60-64                          | 2.56       | 2.16         | 3.04         | <0.001  |
|             | 65-69                          | 3.11       | 2.62         | 3.68         | <0.001  |
|             | 70-74                          | 2.92       | 2.47         | 3.46         | <0.001  |
| 75+         | 2.48                           | 2.09       | 2.93         | <0.001       |         |
| Ethnicity   | White                          | 1.00       |              |              |         |
|             | Asian                          | 0.74       | 0.68         | 0.81         | <0.001  |
|             | Black                          | 1.06       | 0.95         | 1.18         | 0.33    |
|             | Mixed                          | 0.85       | 0.71         | 1.02         | 0.07    |
|             | Other                          | 0.79       | 0.60         | 1.05         | 0.10    |
| Deprivation | IMD 1 (most deprived)          | 1.00       |              |              |         |
|             | IMD 2                          | 1.20       | 1.11         | 1.30         | <0.001  |
|             | IMD 3                          | 1.33       | 1.23         | 1.44         | <0.001  |
|             | IMD 4                          | 1.40       | 1.29         | 1.51         | <0.001  |
|             | IMD 5 (least deprived)         | 1.59       | 1.46         | 1.72         | <0.001  |
| BMI         | Healthy / underweight          | 1.00       |              |              |         |
|             | Overweight                     | 0.97       | 0.91         | 1.04         | 0.44    |
|             | Obese                          | 0.80       | 0.75         | 0.86         | <0.001  |
| Provider    | ICS Health and Wellbeing       | 1.00       |              |              |         |
|             | Ingeus UK Ltd                  | 0.54       | 0.38         | 0.77         | <0.001  |
|             | Living Well Taking Control LLP | 2.05       | 1.50         | 2.81         | <0.001  |
|             | Reed Momenta Ltd               | 0.84       | 0.61         | 1.15         | 0.28    |

| Random-effects Parameters                  | Estimate | Standard error | 95% lower CI | 95% upper CI |
|--------------------------------------------|----------|----------------|--------------|--------------|
| Local Referral Area: Identity<br>sd(_cons) | 0.37     | 0.06           | 0.27         | 0.51         |

\*Due to very small numbers, Indeterminate was not imputed
